# Supplementary material
Source: Springer Nature journal article supplement (https://www.springermedizin.de/resource/supplementary/13256_2012_2565_MOESM3_ESM.pdf/9649948)

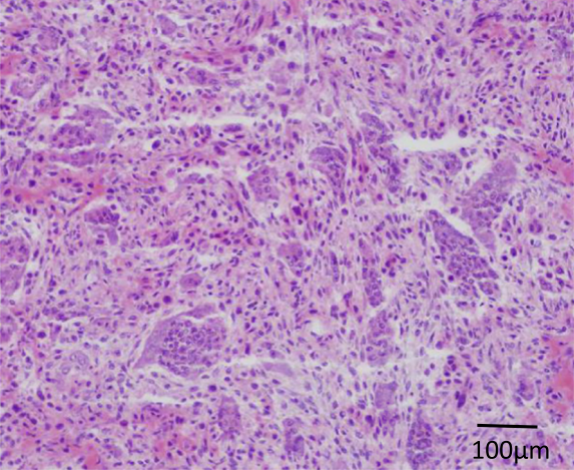

100 $\mu$ m

Supplement: MOESM3 [file 9649948]
